# Supplementary material
Source: MDPI journal article supplement (https://www.mdpi.com/2071-1050/14/5/2889)
Supplement: s1 [file s1]

Archive with 2 entries (2 files):
- supplementary -Copy of questionnaire.pdf
- supplementary -questionnaire data.pdf
