# Supplementary material
Source: MDPI journal article supplement (https://www.mdpi.com/2071-1050/14/5/2889)
Supplement: s1 [file s1 › supplementary -Copy of questionnaire.pdf]

## Questionnaire method: Copy of questionnaire

### Survey on the attraction of contemporary art in temples to tourists

Yuan-Dao Guanyin Temple's architecture, environmental design, blessing cultural relics, and sculptures are presented in the style of contemporary art, which is very different from traditional temples. In order to understand the attractiveness of contemporary art applied to religious tourism, Tourist attitude survey. Please answer the following questions, thank you for your assistance.

"Please tick the correct answer option for each question."

| Question number | Question and Answer options                                                                                                                                                                                                                                             |
|-----------------|-------------------------------------------------------------------------------------------------------------------------------------------------------------------------------------------------------------------------------------------------------------------------|
| A.              | Your gender : ①Male ② Female                                                                                                                                                                                                                                            |
| B.              | Your age : ①18-19 ②20-29 ③30-39 ④40-49 ⑤50-59 ⑥60-Over 60 years old                                                                                                                                                                                                     |
| C.              | How many times have you been here?<br>①The first time ②The second time ③ More than three times                                                                                                                                                                          |
| D.              | How did you know here for the first time?<br>①Recommended by relatives and friends ② Internet ③TV ④Newspaper and magazine ⑤Others:_____ ( description)                                                                                                                  |
| E.              | What is the motivation for coming here?<br>①Religious contemporary art ②Religious activities ③All of the above ④Other:_____ ( description)                                                                                                                              |
| F.              | Can you accept that the religious performance of temple has a contemporary art style?<br>①Yes ②No ③Neutral                                                                                                                                                              |
| G.              | Do you think that religion expressed in contemporary art style will affect religious piety?<br>①Yes ②No ③Neutral                                                                                                                                                        |
| H.              | What religious performances of contemporary art style are attractive?<br>①Sculptures, building ② "Fortune Blessing" media Others ③ Overall environmental design ④ All of the above ⑤ None<br>⑥ Other:_____ ( description)                                               |
| I.              | Would you recommend Yuan-Dao Guanyin Temple to friends and relatives?<br>①Yes ②No ③Neutral                                                                                                                                                                              |
| J.              | Which part of the religious performance with contemporary art style in Yuan-Dao Guanyin Temple would you recommend?<br>①Sculptures, building ② "Fortune Blessing" media Others ③ Overall environmental design ④ All of the above ⑤ None<br>⑥ Other:_____ ( description) |
| K.              | What is your opinion on the design and style of Yuan-Dao Guanyin Temple?<br>①Innovation, art ② Religious culture ③ All of the above<br>④Other:_____ ( description)                                                                                                      |
| L.              | How did you feel during the tour or visit of Yuan-Dao Guanyin Temple?<br>①Relaxation, peace, blessing ② Beautiful, unique, and surprising<br>③ All of the above ④Other:_____ ( description)                                                                             |
| M.              | Will you come to travel or visit again?<br>①Yes ②No ③Neutral                                                                                                                                                                                                            |
