# Supplementary material
Source: MDPI journal article supplement (https://www.mdpi.com/2071-1050/14/5/2889)
Supplement: s1 [file s1 › supplementary -questionnaire data.pdf]

## Questionnaire method: Statistical analysis data

| Question number | A.                                            | B. | C. | D. | E. | F. | G. | H. | I. | J. | K. | L. | M. |
|-----------------|-----------------------------------------------|----|----|----|----|----|----|----|----|----|----|----|----|
| Respondent No.  | Respondents' answer options for each question |    |    |    |    |    |    |    |    |    |    |    |    |
| 1.              | 2                                             | 5  | 3  | 1  | 3  | 1  | 2  | 4  | 1  | 4  | 1  | 3  | 1  |
| 2.              | 2                                             | 4  | 3  | 5  | 3  | 1  | 2  | 4  | 1  | 4  | 1  | 1  | 1  |
| 3.              | 1                                             | 4  | 3  | 1  | 3  | 1  | 1  | 4  | 1  | 4  | 3  | 1  | 1  |
| 4.              | 1                                             | 5  | 3  | 1  | 2  | 1  | 2  | 4  | 1  | 4  | 1  | 3  | 1  |
| 5.              | 1                                             | 2  | 1  | 2  | 1  | 1  | 2  | 1  | 1  | 1  | 3  | 3  | 1  |
| 6.              | 1                                             | 4  | 3  | 1  | 3  | 1  | 2  | 1  | 1  | 1  | 1  | 1  | 1  |
| 7.              | 2                                             | 2  | 1  | 2  | 1  | 1  | 2  | 1  | 1  | 1  | 1  | 2  | 1  |
| 8.              | 1                                             | 2  | 1  | 2  | 1  | 1  | 2  | 1  | 1  | 1  | 3  | 3  | 1  |
| 9.              | 1                                             | 2  | 3  | 1  | 3  | 1  | 2  | 4  | 1  | 4  | 1  | 1  | 1  |
| 10.             | 1                                             | 2  | 3  | 1  | 3  | 1  | 2  | 4  | 1  | 4  | 1  | 1  | 1  |
| 11.             | 1                                             | 2  | 1  | 2  | 1  | 1  | 2  | 4  | 1  | 1  | 1  | 3  | 1  |
| 12.             | 2                                             | 2  | 1  | 5  | 1  | 1  | 2  | 4  | 1  | 1  | 1  | 2  | 1  |
| 13.             | 1                                             | 2  | 1  | 5  | 1  | 1  | 2  | 1  | 1  | 1  | 3  | 3  | 1  |
| 14.             | 2                                             | 2  | 1  | 5  | 1  | 1  | 2  | 1  | 1  | 1  | 1  | 3  | 1  |
| 15.             | 1                                             | 2  | 1  | 2  | 1  | 1  | 2  | 1  | 1  | 4  | 3  | 3  | 1  |
| 16.             | 1                                             | 6  | 3  | 1  | 3  | 1  | 2  | 4  | 1  | 4  | 1  | 1  | 1  |
| 17.             | 2                                             | 5  | 3  | 1  | 3  | 1  | 2  | 4  | 1  | 4  | 1  | 1  | 1  |
| 18.             | 2                                             | 2  | 3  | 1  | 2  | 1  | 2  | 4  | 1  | 4  | 1  | 1  | 1  |
| 19.             | 2                                             | 2  | 1  | 2  | 3  | 1  | 2  | 4  | 1  | 4  | 1  | 1  | 1  |
| 20.             | 1                                             | 4  | 1  | 2  | 1  | 1  | 1  | 3  | 1  | 3  | 1  | 1  | 1  |
| 21.             | 2                                             | 6  | 3  | 1  | 3  | 1  | 2  | 4  | 1  | 3  | 1  | 1  | 1  |
| 22.             | 2                                             | 3  | 1  | 2  | 1  | 1  | 2  | 3  | 1  | 3  | 1  | 1  | 1  |
| 23.             | 1                                             | 4  | 1  | 2  | 1  | 1  | 2  | 3  | 1  | 3  | 3  | 1  | 1  |
| 24.             | 1                                             | 4  | 1  | 2  | 1  | 1  | 2  | 1  | 1  | 1  | 1  | 2  | 1  |
| 25.             | 1                                             | 4  | 1  | 2  | 1  | 1  | 2  | 1  | 1  | 1  | 3  | 2  | 1  |
| 26.             | 2                                             | 5  | 3  | 3  | 3  | 1  | 2  | 4  | 1  | 4  | 3  | 1  | 1  |
| 27.             | 2                                             | 4  | 1  | 2  | 1  | 1  | 1  | 1  | 1  | 1  | 1  | 2  | 1  |
| 28.             | 1                                             | 4  | 1  | 2  | 1  | 1  | 2  | 1  | 1  | 1  | 1  | 2  | 1  |
| 29.             | 1                                             | 3  | 1  | 2  | 1  | 1  | 2  | 1  | 1  | 1  | 1  | 2  | 1  |
| 30.             | 1                                             | 5  | 3  | 1  | 2  | 1  | 2  | 4  | 1  | 4  | 3  | 1  | 1  |
| 31.             | 1                                             | 3  | 3  | 3  | 3  | 1  | 2  | 4  | 1  | 3  | 1  | 1  | 1  |
| 32.             | 2                                             | 5  | 3  | 3  | 3  | 1  | 2  | 4  | 1  | 4  | 1  | 1  | 1  |
| 33.             | 2                                             | 6  | 3  | 1  | 2  | 1  | 2  | 4  | 1  | 4  | 1  | 1  | 1  |
| 34.             | 2                                             | 6  | 3  | 4  | 3  | 1  | 2  | 4  | 1  | 4  | 1  | 1  | 1  |

|     |   |   |   |   |   |   |   |   |   |   |   |   |   |
|-----|---|---|---|---|---|---|---|---|---|---|---|---|---|
| 35. | 1 | 5 | 1 | 2 | 1 | 1 | 1 | 1 | 1 | 1 | 1 | 2 | 1 |
| 36. | 2 | 3 | 3 | 1 | 2 | 1 | 2 | 3 | 1 | 4 | 1 | 1 | 1 |
| 37. | 2 | 6 | 3 | 1 | 2 | 1 | 2 | 4 | 1 | 4 | 1 | 1 | 1 |
| 38. | 1 | 4 | 3 | 1 | 2 | 1 | 2 | 3 | 1 | 4 | 2 | 1 | 1 |
| 39. | 1 | 5 | 3 | 1 | 2 | 1 | 2 | 3 | 1 | 3 | 3 | 1 | 1 |
| 40. | 1 | 3 | 1 | 2 | 3 | 1 | 2 | 4 | 1 | 3 | 3 | 1 | 1 |
| 41. | 1 | 2 | 3 | 1 | 2 | 1 | 2 | 4 | 1 | 4 | 3 | 1 | 1 |
| 42. | 2 | 3 | 1 | 2 | 1 | 1 | 2 | 4 | 1 | 4 | 1 | 1 | 1 |
| 43. | 1 | 5 | 3 | 1 | 2 | 1 | 2 | 4 | 1 | 4 | 3 | 1 | 1 |
| 44. | 2 | 6 | 3 | 1 | 2 | 1 | 2 | 4 | 1 | 4 | 1 | 1 | 1 |
| 45. | 1 | 4 | 3 | 1 | 2 | 1 | 2 | 3 | 1 | 4 | 1 | 1 | 1 |
| 46. | 1 | 5 | 3 | 1 | 2 | 1 | 2 | 3 | 1 | 3 | 3 | 3 | 1 |
| 47. | 1 | 2 | 3 | 1 | 2 | 1 | 2 | 4 | 1 | 4 | 3 | 1 | 1 |
| 48. | 2 | 3 | 1 | 3 | 1 | 1 | 2 | 4 | 1 | 4 | 1 | 1 | 1 |
| 49. | 1 | 3 | 1 | 3 | 3 | 1 | 2 | 4 | 1 | 3 | 3 | 1 | 1 |
| 50. | 1 | 5 | 3 | 1 | 2 | 1 | 2 | 4 | 1 | 4 | 3 | 1 | 1 |
| 51. | 1 | 5 | 3 | 1 | 2 | 1 | 2 | 4 | 1 | 3 | 3 | 3 | 1 |
| 52. | 2 | 6 | 3 | 1 | 2 | 1 | 2 | 4 | 1 | 4 | 1 | 1 | 1 |
| 53. | 1 | 4 | 3 | 1 | 2 | 1 | 2 | 3 | 1 | 4 | 1 | 1 | 1 |
| 54. | 1 | 4 | 1 | 4 | 1 | 1 | 1 | 1 | 1 | 1 | 1 | 2 | 1 |
| 55. | 1 | 2 | 3 | 1 | 2 | 1 | 2 | 4 | 1 | 4 | 3 | 1 | 1 |
| 56. | 2 | 3 | 1 | 3 | 1 | 1 | 2 | 4 | 1 | 4 | 1 | 1 | 1 |
| 57. | 1 | 3 | 1 | 4 | 3 | 1 | 2 | 4 | 1 | 3 | 1 | 1 | 1 |
| 58. | 1 | 5 | 3 | 1 | 2 | 1 | 2 | 4 | 1 | 4 | 1 | 1 | 1 |
| 59. | 2 | 5 | 3 | 1 | 3 | 1 | 2 | 4 | 1 | 4 | 1 | 3 | 1 |
| 60. | 2 | 4 | 3 | 1 | 3 | 1 | 2 | 4 | 1 | 4 | 1 | 3 | 1 |
| 61. | 1 | 4 | 3 | 1 | 3 | 1 | 2 | 4 | 1 | 4 | 3 | 1 | 1 |
| 62. | 1 | 5 | 3 | 1 | 2 | 1 | 2 | 4 | 1 | 4 | 1 | 3 | 1 |
| 63. | 1 | 2 | 1 | 4 | 1 | 1 | 2 | 1 | 1 | 1 | 3 | 3 | 1 |
| 64. | 1 | 4 | 3 | 1 | 3 | 1 | 2 | 1 | 1 | 1 | 1 | 1 | 1 |
| 65. | 2 | 2 | 1 | 2 | 1 | 1 | 2 | 1 | 1 | 1 | 1 | 2 | 1 |
| 66. | 1 | 2 | 1 | 2 | 1 | 1 | 2 | 1 | 1 | 1 | 3 | 3 | 1 |
| 67. | 1 | 2 | 3 | 1 | 3 | 1 | 2 | 4 | 1 | 4 | 2 | 1 | 1 |
| 68. | 1 | 4 | 1 | 3 | 1 | 1 | 2 | 1 | 1 | 1 | 1 | 2 | 1 |
| 69. | 1 | 4 | 3 | 1 | 3 | 1 | 2 | 4 | 1 | 4 | 1 | 3 | 1 |
| 70. | 2 | 4 | 1 | 3 | 1 | 1 | 2 | 1 | 1 | 1 | 3 | 2 | 1 |
| 71. | 1 | 2 | 3 | 1 | 3 | 1 | 2 | 3 | 1 | 4 | 2 | 1 | 1 |

|      |   |   |   |   |   |   |   |   |   |   |   |   |   |
|------|---|---|---|---|---|---|---|---|---|---|---|---|---|
| 72.  | 1 | 4 | 1 | 4 | 1 | 1 | 2 | 1 | 1 | 1 | 1 | 2 | 1 |
| 73.  | 1 | 3 | 1 | 4 | 1 | 1 | 2 | 1 | 1 | 1 | 1 | 2 | 1 |
| 74.  | 2 | 5 | 3 | 1 | 3 | 1 | 2 | 4 | 1 | 4 | 1 | 1 | 1 |
| 75.  | 2 | 5 | 3 | 1 | 3 | 1 | 2 | 4 | 1 | 4 | 1 | 3 | 1 |
| 76.  | 2 | 4 | 3 | 1 | 3 | 1 | 2 | 4 | 1 | 4 | 3 | 1 | 1 |
| 77.  | 1 | 5 | 3 | 1 | 2 | 1 | 2 | 4 | 1 | 4 | 1 | 3 | 1 |
| 78.  | 1 | 2 | 1 | 3 | 1 | 1 | 2 | 1 | 1 | 1 | 3 | 3 | 1 |
| 79.  | 2 | 5 | 3 | 1 | 3 | 1 | 2 | 4 | 1 | 4 | 1 | 3 | 1 |
| 80.  | 1 | 4 | 3 | 1 | 2 | 1 | 2 | 1 | 1 | 1 | 3 | 1 | 1 |
| 81.  | 2 | 2 | 1 | 2 | 1 | 1 | 2 | 1 | 1 | 1 | 3 | 2 | 1 |
| 82.  | 1 | 2 | 1 | 2 | 1 | 1 | 2 | 1 | 1 | 1 | 3 | 2 | 1 |
| 83.  | 2 | 4 | 3 | 1 | 3 | 1 | 2 | 4 | 1 | 4 | 1 | 3 | 1 |
| 84.  | 1 | 4 | 3 | 1 | 3 | 1 | 2 | 4 | 1 | 4 | 3 | 1 | 1 |
| 85.  | 1 | 5 | 3 | 1 | 2 | 1 | 2 | 4 | 1 | 4 | 1 | 3 | 1 |
| 86.  | 1 | 2 | 1 | 2 | 1 | 1 | 2 | 1 | 1 | 1 | 3 | 1 | 1 |
| 87.  | 1 | 4 | 3 | 1 | 3 | 1 | 2 | 1 | 1 | 1 | 3 | 1 | 1 |
| 88.  | 2 | 2 | 1 | 2 | 1 | 1 | 2 | 1 | 1 | 1 | 1 | 1 | 1 |
| 89.  | 1 | 2 | 1 | 2 | 1 | 1 | 2 | 1 | 1 | 1 | 3 | 3 | 1 |
| 90.  | 1 | 2 | 3 | 1 | 3 | 1 | 2 | 1 | 1 | 1 | 1 | 1 | 1 |
| 91.  | 2 | 5 | 3 | 1 | 3 | 1 | 2 | 4 | 1 | 4 | 1 | 3 | 1 |
| 92.  | 2 | 4 | 3 | 1 | 3 | 1 | 2 | 4 | 1 | 4 | 1 | 1 | 1 |
| 93.  | 1 | 2 | 1 | 3 | 1 | 1 | 2 | 1 | 1 | 1 | 3 | 1 | 1 |
| 94.  | 1 | 4 | 3 | 1 | 1 | 1 | 1 | 4 | 1 | 4 | 3 | 1 | 1 |
| 95.  | 1 | 4 | 3 | 1 | 3 | 1 | 2 | 1 | 1 | 1 | 3 | 1 | 1 |
| 96.  | 1 | 5 | 3 | 1 | 2 | 1 | 2 | 4 | 1 | 4 | 1 | 3 | 1 |
| 97.  | 2 | 2 | 1 | 2 | 1 | 1 | 2 | 1 | 1 | 1 | 1 | 2 | 1 |
| 98.  | 1 | 2 | 1 | 2 | 1 | 1 | 2 | 1 | 1 | 1 | 3 | 3 | 1 |
| 99.  | 1 | 2 | 3 | 3 | 3 | 1 | 2 | 1 | 1 | 3 | 2 | 1 | 1 |
| 100. | 1 | 3 | 3 | 3 | 3 | 1 | 2 | 4 | 1 | 3 | 1 | 1 | 1 |
| 101. | 2 | 5 | 3 | 4 | 3 | 1 | 2 | 4 | 1 | 4 | 1 | 3 | 1 |
| 102. | 2 | 6 | 3 | 1 | 2 | 1 | 2 | 4 | 1 | 4 | 1 | 1 | 1 |
| 103. | 2 | 6 | 3 | 4 | 3 | 1 | 2 | 4 | 1 | 4 | 1 | 1 | 1 |
| 104. | 1 | 5 | 1 | 4 | 1 | 1 | 1 | 1 | 1 | 1 | 1 | 2 | 1 |
| 105. | 2 | 3 | 3 | 1 | 2 | 1 | 2 | 4 | 1 | 4 | 1 | 1 | 1 |
| 106. | 1 | 5 | 3 | 1 | 2 | 1 | 2 | 4 | 1 | 4 | 3 | 3 | 1 |
| 107. | 2 | 6 | 3 | 1 | 2 | 1 | 2 | 4 | 1 | 4 | 1 | 3 | 1 |
| 108. | 1 | 4 | 1 | 4 | 1 | 1 | 2 | 1 | 1 | 1 | 3 | 2 | 1 |

|      |   |   |   |   |   |   |   |   |   |   |   |   |   |
|------|---|---|---|---|---|---|---|---|---|---|---|---|---|
| 109. | 2 | 2 | 1 | 5 | 1 | 1 | 2 | 1 | 1 | 1 | 1 | 3 | 1 |
| 110. | 1 | 2 | 1 | 2 | 1 | 1 | 2 | 1 | 1 | 3 | 3 | 3 | 1 |
| 111. | 2 | 2 | 1 | 5 | 1 | 1 | 2 | 1 | 1 | 1 | 3 | 3 | 1 |
| 112. | 2 | 3 | 1 | 5 | 1 | 1 | 2 | 1 | 1 | 1 | 1 | 3 | 1 |
| 113. | 1 | 3 | 1 | 3 | 1 | 1 | 2 | 1 | 1 | 3 | 3 | 3 | 1 |
| 114. | 2 | 3 | 1 | 2 | 1 | 1 | 2 | 1 | 1 | 3 | 1 | 3 | 1 |
| 115. | 1 | 3 | 1 | 2 | 3 | 1 | 2 | 1 | 1 | 1 | 3 | 3 | 1 |
